# Supplementary material for: Functionalization of Bacterial Microcompartment Shell Proteins With Covalently Attached Heme
Source: Front Bioeng Biotechnol. 2020 Jan 9;7:432. doi: 10.3389/fbioe.2019.00432 (PMC6962350; doi:10.3389/fbioe.2019.00432)
Supplement: Supplementary file 1 [file Table_1.xlsx]

## Sheet: Sheet1
Supplementary Table 1: List of structures used for the generation of Figure 1B. The first column contains the Protein Data Bank entry, the second column contains the chain identifier, and the third column contains the description of each entry.
pdb entry	chain	description from pdb
19hc	A	PROTEIN (NINE-HAEM CYTOCHROME C)
1aqe	A	CYTOCHROME C3
1bvb	A	CYTOCHROME C-554
1czj	A	CYTOCHROME C3
1d4c	A	FLAVOCYTOCHROME C FUMARATE REDUCTASE
1d4e	A	FLAVOCYTOCHROME C FUMARATE REDUCTASE
1duw	A	NONAHEME CYTOCHROME C
1e+39	A	FUMARATE REDUCTASE FLAVOPROTEIN SUBUNIT
1eb7	A	CYTOCHROME C551 PEROXIDASE
1etp	A	CYTOCHROME C4
1fcd	C	FLAVOCYTOCHROME C SULFIDE DEHYDROGENASE (CYTOCHROME SUBUNIT)
1fgj	A	HYDROXYLAMINE OXIDOREDUCTASE
1fs8	A	CYTOCHROME C NITRITE REDUCTASE
1fs9	A	CYTOCHROME C NITRITE REDUCTASE
1ft6	A	CYTOCHROME C554
1gmb	A	CYTOCHROME C3
1gu6	A	CYTOCHROME C552
1gyo	A	CYTOCHROME C3, A DIMERIC CLASS III C-TYPE CYTOCHROME
1h1o	A	CYTOCHROME C-552
1h21	A	SPLIT-SORET CYTOCHROME C
1h29	A	HIGH-MOLECULAR-WEIGHT CYTOCHROME C
1h31	A	DIHEME CYTOCHROME C
1h32	A	DIHEME CYTOCHROME C
1h33	A	DIHEME CYTOCHROME C
1hh5	A	CYTOCHROME C7
1i77	A	CYTOCHROME C3
1iqc	A	di-heme peroxidase
1j0p	A	Cytochrome c3
1jmx	A	Amine Dehydrogenase
1jni	A	DIHEME CYTOCHROME C NAPB
1jrx	A	FLAVOCYTOCHROME C
1jry	A	FLAVOCYTOCHROME C
1jrz	A	FLAVOCYTOCHROME C
1kss	A	flavocytochrome c
1ksu	A	flavocytochrome c
1lj1	A	flavocytochrome c3
1m1p	A	Small tetraheme cytochrome c
1m1r	A	SMALL tetraheme cytochrome c
1m64	A	flavocytochrome c3
1m6z	A	Cytochrome c4
1m70	A	Cytochrome c4
1mdv	A	CYTOCHROME C3
1nml	A	di-haem cytochrome c peroxidase
1oah	A	CYTOCHROME C NITRITE REDUCTASE
1ofw	A	NINE-HEME CYTOCHROME C
1ofy	A	NINE HEME CYTOCHROME C
1ogy	B	DIHEME CYTOCHROME C NAPB MOLECULE: NITRATE REDUCTASE
1p2e	A	flavocytochrome c3
1p2h	A	flavocytochrome c3
1pby	A	quinohemoprotein amine dehydrogenase 60 kDa subunit
1q16	B	Respiratory nitrate reductase 1 beta chain
1q9i	A	flavocytochrome c3
1qdb	A	CYTOCHROME C NITRITE REDUCTASE
1qo8	A	FLAVOCYTOCHROME C3 FUMARATE REDUCTASE
1r27	B	Respiratory nitrate reductase 1 beta chain
1rwj	A	Cytochrome c family protein
1rz6	A	Cytochrome c peroxidase
1sp3	A	cytochrome c, putative
1up9	A	CYTOCHROME C3
1vrn	C	Photosynthetic reaction center cytochrome c subunit
1w7o	A	CYTOCHROME C3
1wad	A	CYTOCHROME C3
1wr5	A	Cytochrome c3
1y0p	A	Fumarate reductase flavoprotein subunit
1y5l	B	Respiratory nitrate reductase 1 beta chain
1yqd	A	sinapyl alcohol dehydrogenase
1yqx	A	sinapyl alcohol dehydrogenase
1z1n	X	sixteen heme cytochrome
1zzh	A	cytochrome c peroxidase
2a3p	A	COG3005: Nitrate/TMAO reductases, membrane-bound tetraheme cytochrome c subunit
2b7r	A	Fumarate reductase flavoprotein subunit
2b7s	A	Fumarate reductase flavoprotein subunit
2bq4	A	BASIC CYTOCHROME C3
2c1u	A	DI-HAEM CYTOCHROME C PEROXIDASE
2c1v	A	DI-HAEM CYTOCHROME C PEROXIDASE
2cdv	A	CYTOCHROME C3
2cth	A	CYTOCHROME C3
2cvc	A	High-molecular-weight cytochrome c precursor
2cy3	A	CYTOCHROME C3
2czs	A	cytochrome c, putative
2e81	A	Cytochrome c-552
2e84	A	High-molecular-weight cytochrome c
2ewi	A	Cytochrome c3
2ewk	A	Cytochrome c3
2ewu	A	Cytochrome c3
2ffn	A	Cytochrome c3
2fw5	A	DHC, diheme cytochrome c
2fwt	A	DHC, diheme cytochrome c
2j7a	A	CYTOCHROME C NITRITE REDUCTASE NRFA
2ot4	A	Eight-heme nitrite reductase
2oz1	A	Diheme cytochrome c
2p0b	A	Cytochrome c-type protein nrfB
2rdz	A	Cytochrome c-552
2rf7	A	Cytochrome c-552
2vhd	A	CYTOCHROME C551 PEROXIDASE
2vr0	A	CYTOCHROME C NITRITE REDUCTASE, CATALYTIC SUBUNIT NFRA
2wjn	C	PHOTOSYNTHETIC REACTION CENTER CYTOCHROME C SUBUNIT
2x5v	C	PHOTOSYNTHETIC REACTION CENTER CYTOCHROME C SUBUNIT
2yxc	A	Cytochrome c3
2yyw	A	Cytochrome c3
2yyx	A	Cytochrome c3
2z47	A	Cytochrome c3
2zo5	A	Eight-heme nitrite reductase
3bng	A	Cytochrome c-552
3bnj	A	Cytochrome c-552
3bxu	A	Cytochrome c3
3cao	A	CYTOCHROME C3
3cyr	A	CYTOCHROME C3
3d1i	A	Eight-heme nitrite reductase
3f29	A	Eight-heme nitrite reductase
3fo3	A	Eight-heme nitrite reductase
3gm6	A	Eight-heme nitrite reductase
3h33	A	Cytochrome c7
3h34	A	Cytochrome c7
3h4n	A	Cytochrome c7
3hq6	A	Cytochrome c551 peroxidase
3hq7	A	Cytochrome c551 peroxidase
3hq8	A	Cytochrome c551 peroxidase
3hq9	A	Cytochrome c551 peroxidase
3ir6	B	Respiratory nitrate reductase 1 beta chain
3l1t	A	Cytochrome c-552
3lg1	A	Eight-heme nitrite reductase
3lgq	A	Eight-heme nitrite reductase
3mk7	B	Cytochrome c oxidase, cbb3-type, subunit O
3mmo	A	Eight-heme nitrite reductase
3o5a	B	Diheme cytochrome c napB
3o5c	A	Cytochrome c551 peroxidase
3oue	A	Cytochrome c family protein
3ouq	A	Cytochrome c family protein
3ov0	A	Cytochrome c family protein
3owm	A	Eight-heme nitrite reductase
3pmq	A	Decaheme cytochrome c MtrF
3rkh	A	Eight-heme nitrite reductase
3s7w	A	Eight-heme nitrite reductase
3sce	A	Eight-heme nitrite reductase
3sel	X	CYTOCHROME C7
3sj0	X	CYTOCHROME C7
3sj1	X	CYTOCHROME C7
3sj4	X	CYTOCHROME C7
3sxq	A	Eight-heme nitrite reductase
3t6d	C	Photosynthetic reaction center cytochrome c subunit
3tor	A	Cytochrome c nitrite reductase
3ttb	A	Eight-heme nitrite reductase
3u99	A	Diheme cytochrome c
3ubr	A	Cytochrome c-552
3uu9	A	Eight-heme nitrite reductase
3vrd	A	Flavocytochrome c heme subunit
4aal	A	CYTOCHROME C551 PEROXIDASE
4aan	A	CYTOCHROME C551 PEROXIDASE
4aao	A	CYTOCHROME C551 PEROXIDASE
4fas	A	Hydroxylamine oxidoreductase
4l38	A	Eight-heme nitrite reductase
4l3x	A	Eight-heme nitrite reductase
4l3y	A	Eight-heme nitrite reductase
4l3z	A	Eight-heme nitrite reductase
4lm8	A	Extracellular iron oxide respiratory system surface decaheme cytochrome c component MtrC
4lmh	A	Extracellular iron oxide respiratory system surface decaheme cytochrome c component OmcA
4n4k	A	hydroxylamine oxidoreductase
4n4m	A	hydroxylamine oxidoreductase
4n4n	A	Hydroxylamine oxidoreductase
4n4o	A	Hydroxylamine oxidoreductase
4q0t	A	Eight-heme nitrite reductase
4q17	A	Eight-heme nitrite reductase
4q1o	A	Eight-heme nitrite reductase
4q4u	A	Eight-heme nitrite reductase
4q5b	A	Eight-heme nitrite reductase
4q5c	A	Eight-heme nitrite reductase
4qo5	A	Hypothetical multiheme protein
4rwm	A	Similar to hydroxylamine oxidoreductase hao
4v2k	A	THIOSULFATE DEHYDROGENASE
4wjy	A	Cytochrome c-552
4wq8	A	Thiosulfate dehydrogenase
4wqa	A	Thiosulfate dehydrogenase
4wqc	A	Thiosulfate dehydrogenase
4wqe	A	Thiosulfate dehydrogenase
5c2w	A	HYDRAZINE SYNTHASE ALPHA SUBUNIT
5djq	B	Cbb3-type cytochrome c oxidase subunit II
5lo9	A	Cytochrome C
5m7j	A	Photosynthetic reaction center cytochrome c subunit
5m7l	A	Photosynthetic reaction center cytochrome c subunit
